# Supplementary material
Source: publisher figshare collection journal article supplement (https://asha.figshare.com/ndownloader/files/25688351)
Supplement: Supplementary file 1 [file 25688351]

34 **Supplementary materials**  
 35

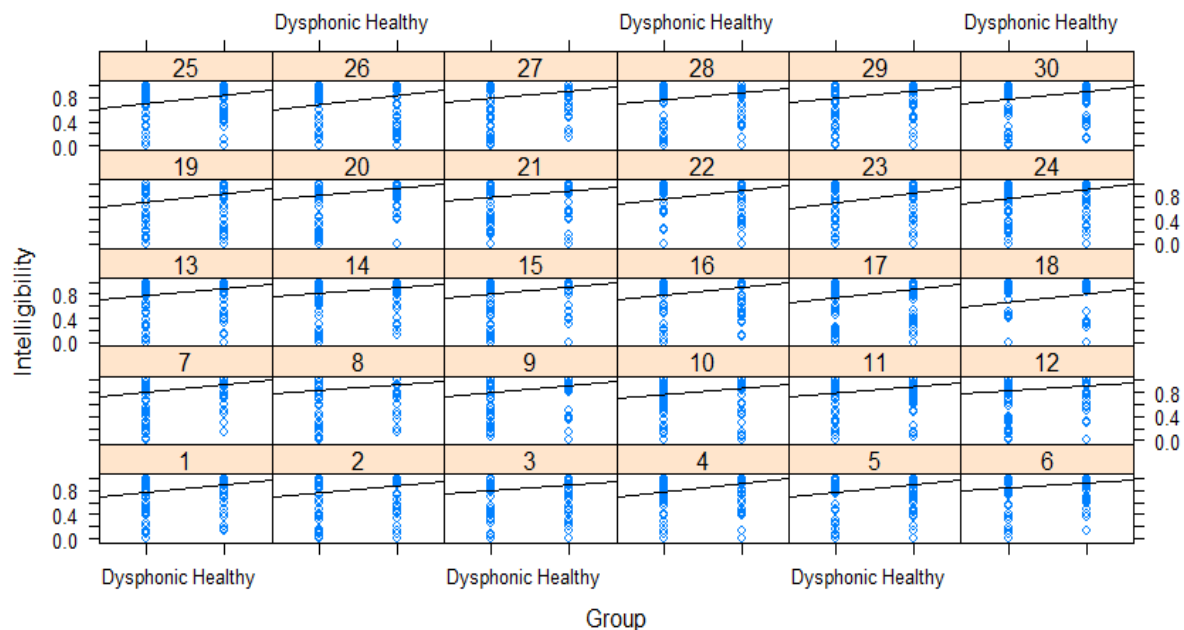

36  
 37 **Supplementary Figure 1: The effect of group for each participant**  
 38

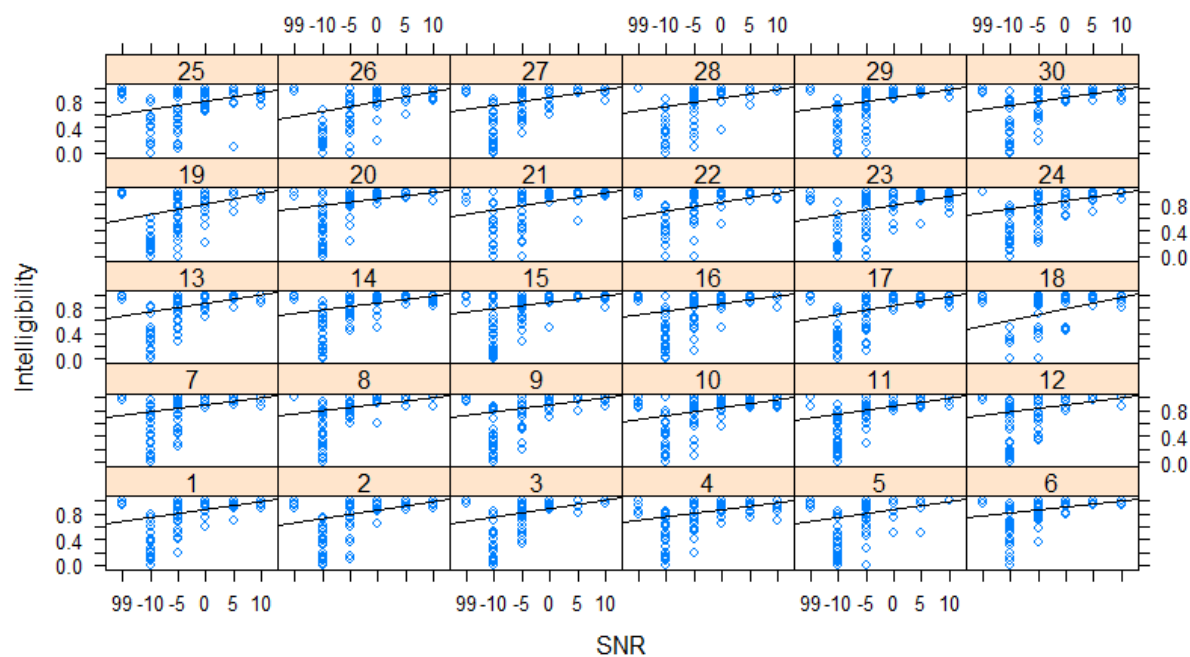

39  
 40  
 41 **Supplementary Figure 2. The effect of SNR for each participant. 99 stands for the quiet or**  
 42 **silence condition.**  
 43  
 44  
 45  
 46  
 47

48

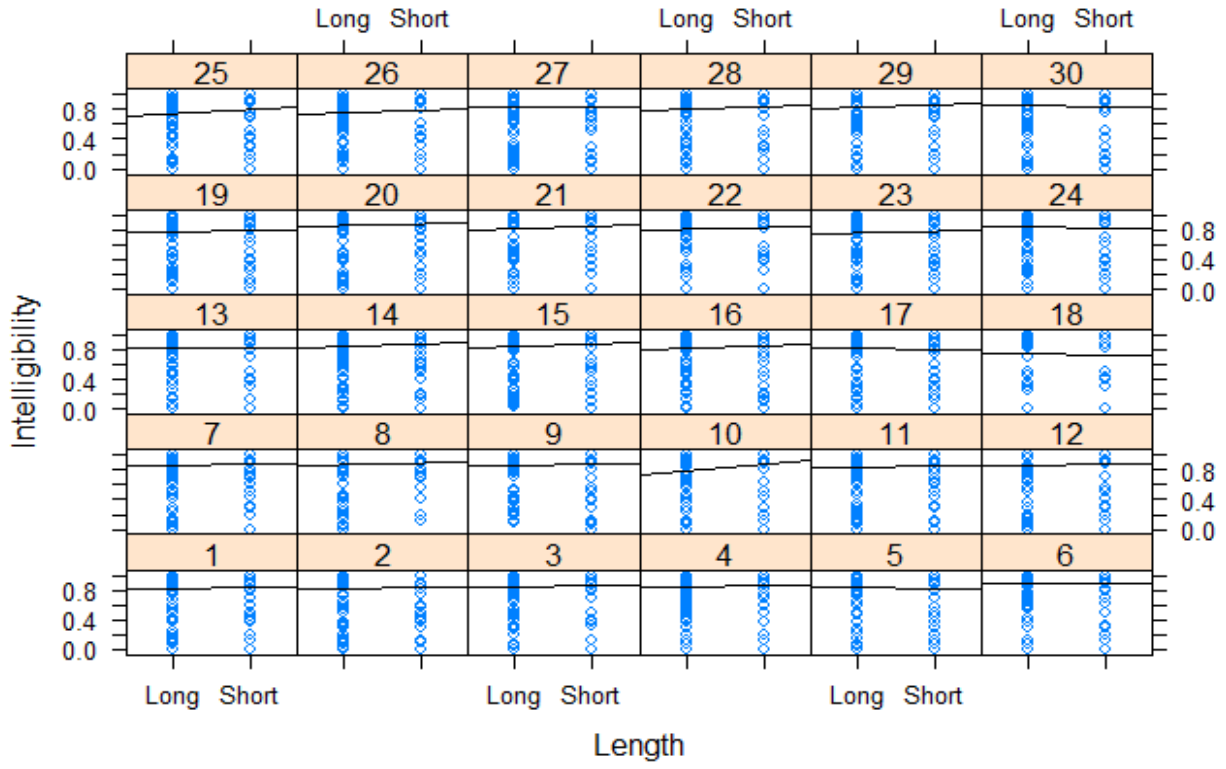

49

50

51 Supplementary Figure 3. The effect of Length for each participant

52

53

54

55

56

57

58

59

60

61

62

63

64
